# Supplementary material for: Identification of Fatty Acid, Lipid and Polyphenol Compounds from Prunus armeniaca L. Kernel Extracts
Source: PubMed Central journal article supplement (PMC7404456; doi:10.3390/foods9070896), 2020-07-08
Supplement: foods-09-00896-s001.pdf [file foods-09-00896-s001.pdf]

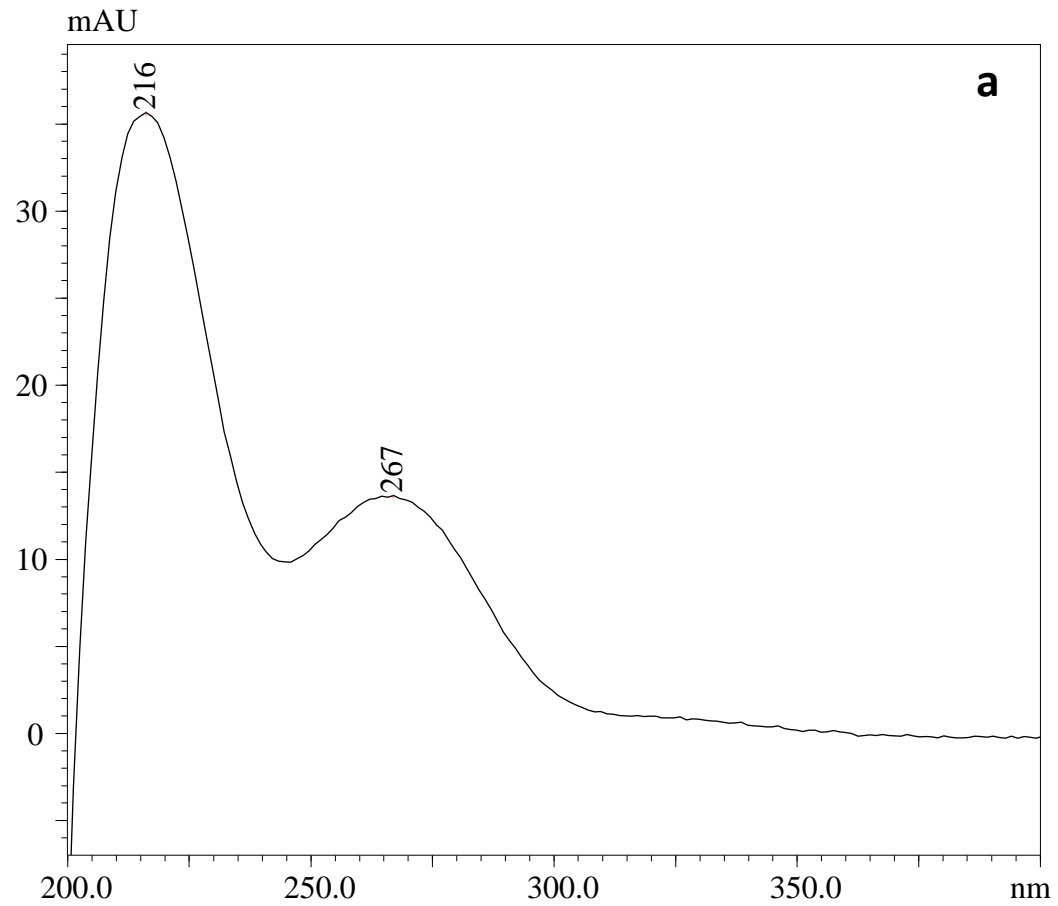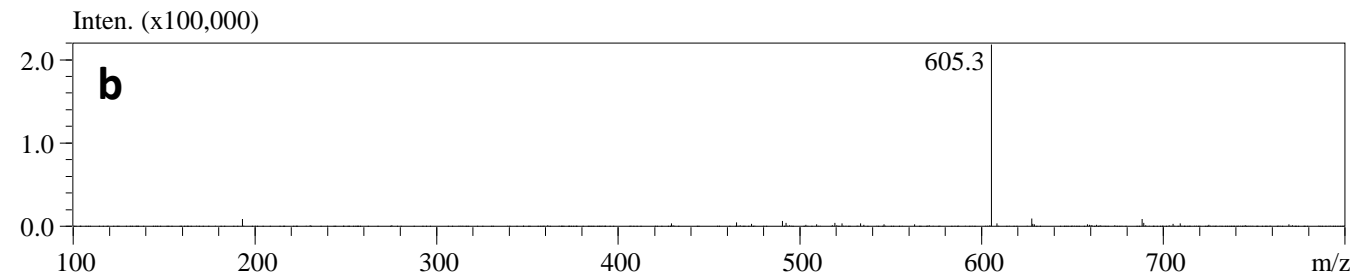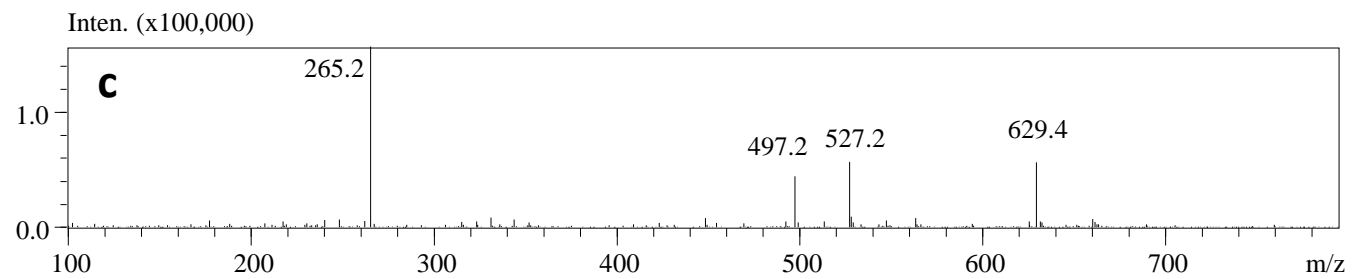

Figure S1. a) UV, b) MS negative spectrum and c) MS positive spectrum of peak 9.
